# Supplementary material for: Natural-product-inspired design and synthesis of thiolated coenzyme Q analogs as promising agents against Gram-positive bacterial strains: insights into structure–activity relationship, activity profile, mode of action, and molecular docking
Source: Royal Society of Chemistry journal article supplement (doi:10.1039/d2ra02136f), 2022-01-01
Supplement: d2ra02136f1.pdf [file d2ra02136f1.pdf]

## Supplementary Material (SM)

# Natural-product-inspired Design and Synthesis of Thiolated Coenzyme Q Analogs as Promising Agents against Gram-positive Bacterial Strains: Insights into Structure-activity Relationship, Activity Profile, Mode of Action, and Molecular Docking

Hatice Yıldırım <sup>a</sup>, Mahmut Yıldız <sup>b</sup>, Nilüfer Bayrak <sup>a</sup>, Emel Mataracı-Kara <sup>c</sup>, Berna Özbek-Çelik <sup>c</sup>, Masami Otsuka <sup>d,e</sup>, Mikako Fujita <sup>d</sup>, Mohamed O. Radwan <sup>d,f</sup>, and Amaç Fatih TuYuN <sup>\*,g</sup>

<sup>a</sup> Department of Chemistry, Engineering Faculty, Istanbul University-Cerrahpasa, Avcılar, 34320, Istanbul, Turkey

<sup>b</sup> Department of Chemistry, Gebze Technical University, Gebze, 41400, Kocaeli, Turkey

<sup>c</sup> Department of Pharmaceutical Microbiology, Pharmacy Faculty, Istanbul University, Beyazıt, 34116, Istanbul, Turkey

<sup>d</sup> Medicinal and Biological Chemistry Science Farm Joint Research Laboratory, Faculty of Life Sciences, Kumamoto University, 5-1 Oe-honmachi, Chuo-ku, Kumamoto, Kumamoto 862-0973, Japan

<sup>e</sup> Department of Drug Discovery, Science Farm Ltd., 1-7-30 Kuhonji, Chuo-ku, Kumamoto, Kumamoto 862-0976, Japan

<sup>f</sup> Chemistry of Natural Compounds Department, Pharmaceutical and Drug Industries Research Division, National Research Centre, Dokki, Cairo 12622, Egypt

<sup>g</sup> Department of Chemistry, Faculty of Science, Istanbul University, Fatih, Istanbul, Turkey

\* Author to whom correspondence should be addressed; E-Mail: [aftuyun@gmail.com](mailto:aftuyun@gmail.com), [aftuyun@istanbul.edu.tr](mailto:aftuyun@istanbul.edu.tr)  
(A. F. T.).

## Contents

|                                                                                           |        |
|-------------------------------------------------------------------------------------------|--------|
| Properties and MIC results of the 20 clinically obtained MRSA                             | S3     |
| <sup>1</sup> H and <sup>13</sup> C spectra of the thiolated CoQ analogs ( <b>CoQ1-8</b> ) | S4-11  |
| The details of all crystallographic data of the <b>CoQ1</b>                               | S12-16 |
| ADME data for <b>CoQ3-8</b>                                                               | S17-18 |

| Code of Strains | Isolate | Specimens | MIC values ( $\mu\text{g/mL}$ ) |        |
|-----------------|---------|-----------|---------------------------------|--------|
|                 |         |           | CoQ1                            | CoQ2   |
| S2              | MRSA    | Blood     | 39.06                           | 39.06  |
| S4              | MRSA    | Blood     | 39.06                           | 39.06  |
| S5              | MRSA    | Blood     | 19.53                           | 19.53  |
| S10             | MRSA    | Blood     | 19.53                           | 19.53  |
| S12             | MRSA    | Blood     | 19.53                           | 19.53  |
| S18             | MRSA    | Blood     | 19.53                           | 19.53  |
| SA1             | MRSA    | Blood     | 78.12                           | 625.00 |
| SA2             | MRSA    | Blood     | 39.06                           | 78.12  |
| SA3             | MRSA    | Blood     | 39.06                           | 39.06  |
| SA4             | MRSA    | Blood     | 19.53                           | 19.53  |
| SA5             | MRSA    | Blood     | 9.76                            | 19.53  |
| SA6             | MRSA    | Blood     | 9.76                            | 19.53  |
| SA11            | MRSA    | Blood     | 78.12                           | 78.12  |
| SA14            | MRSA    | Blood     | 19.53                           | 19.53  |
| SA15            | MRSA    | Blood     | 19.53                           | 19.53  |
| SA16            | MRSA    | Blood     | 39.06                           | 78.12  |
| SA17            | MRSA    | Blood     | 39.06                           | 78.12  |
| SA18            | MRSA    | Blood     | 39.06                           | 78.12  |
| SA19            | MRSA    | Blood     | 39.06                           | 39.06  |
| SA20            | MRSA    | Blood     | 19.53                           | 19.53  |

**Table S1.** Properties and MIC results of the 20 clinically obtained MRSA

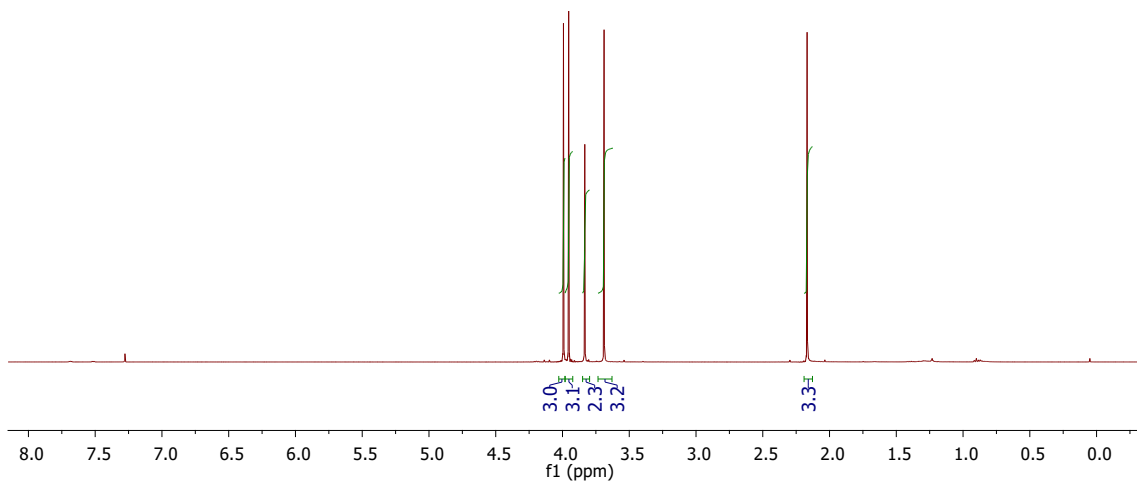

**Figure S1:**  $^1\text{H}$  NMR (500 MHz) spectrum of the CoQ1 in  $\text{CDCl}_3\text{-}d_1$

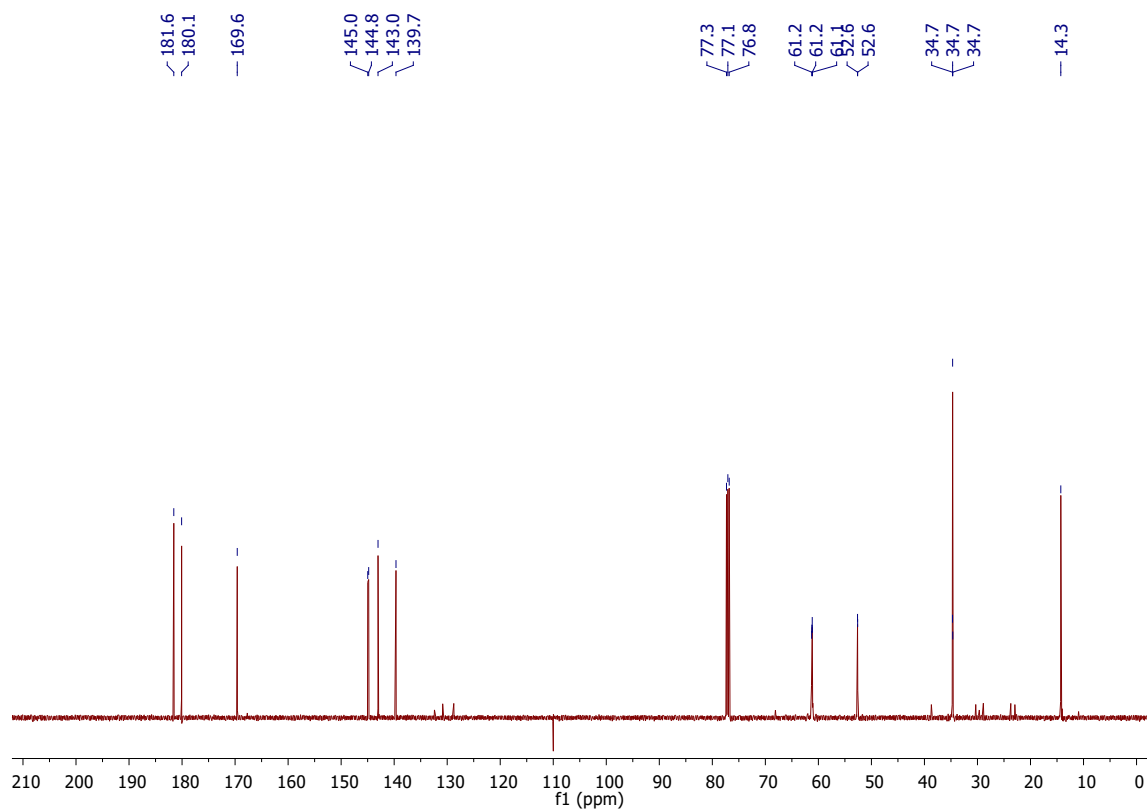

**Figure S2:**  $^{13}\text{C}$  NMR (125 MHz) spectrum of the CoQ1 in  $\text{CDCl}_3\text{-}d_1$

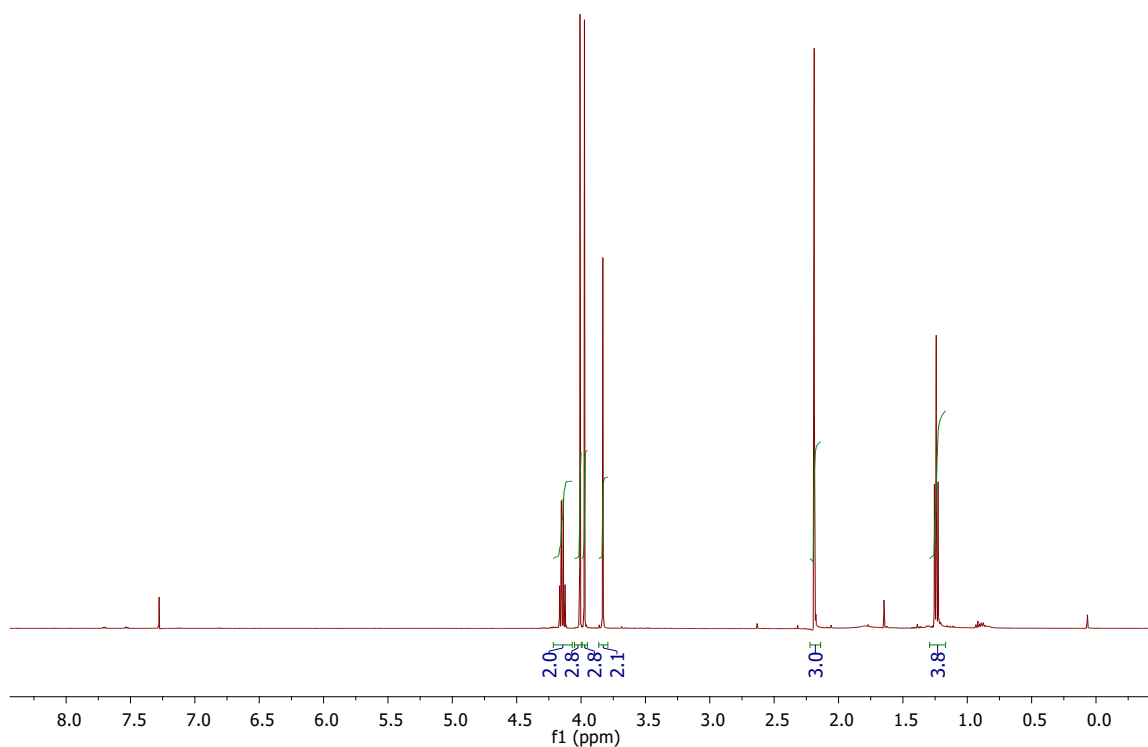

**Figure S3:**  $^1\text{H}$  NMR (500 MHz) spectrum of the CoQ2 in  $\text{CDCl}_3\text{-}d_1$

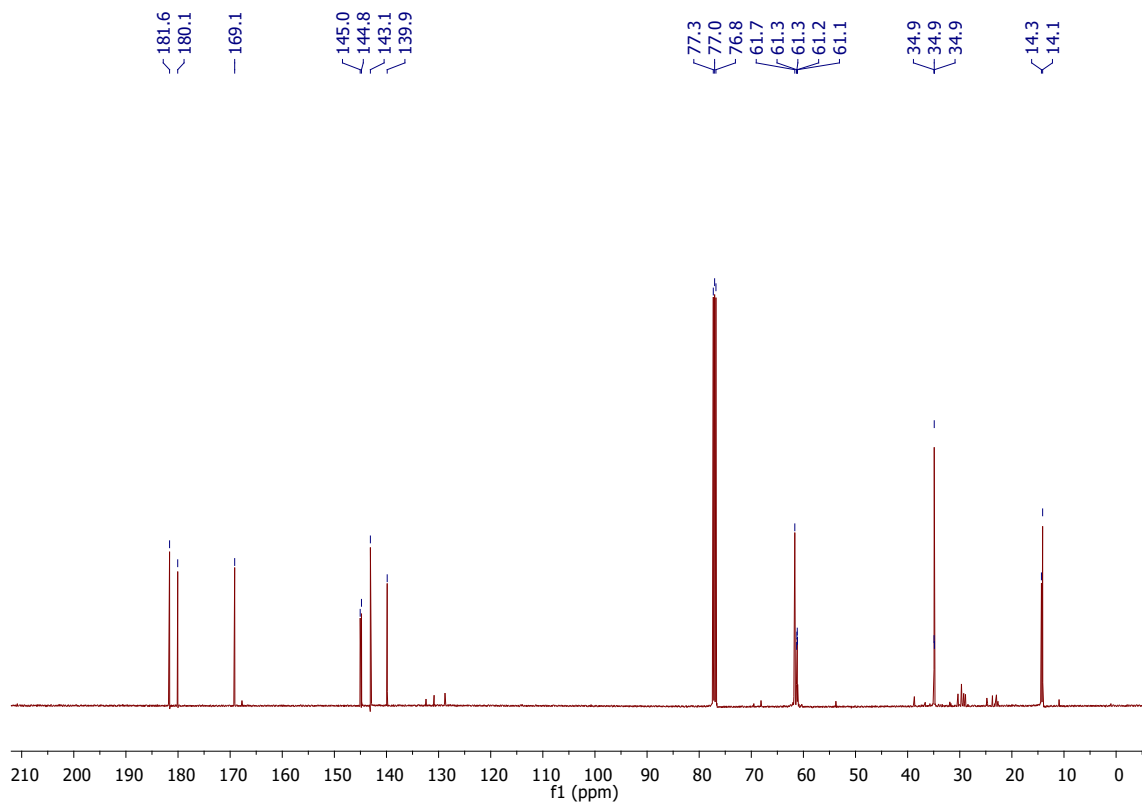

**Figure S4:**  $^{13}\text{C}$  NMR (125 MHz) spectrum of the CoQ2 in  $\text{CDCl}_3\text{-}d_1$

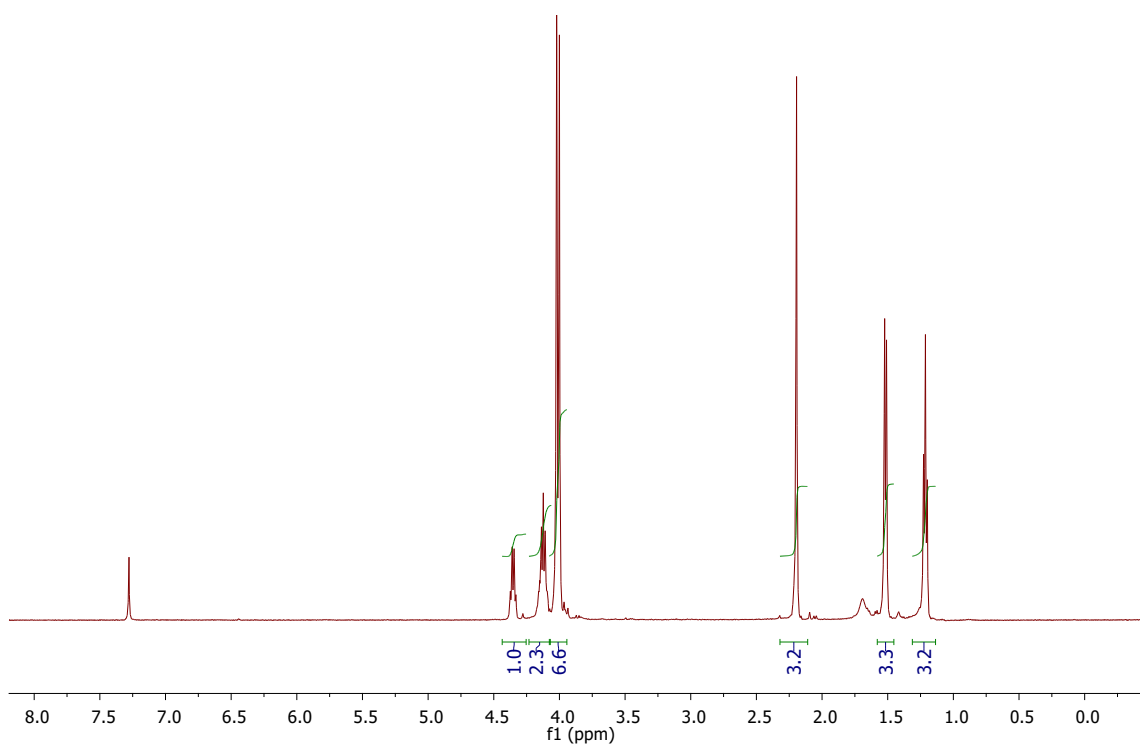

Figure S5:  $^1\text{H}$  NMR (500 MHz) spectrum of the CoQ3 in  $\text{CDCl}_3\text{-}d_1$

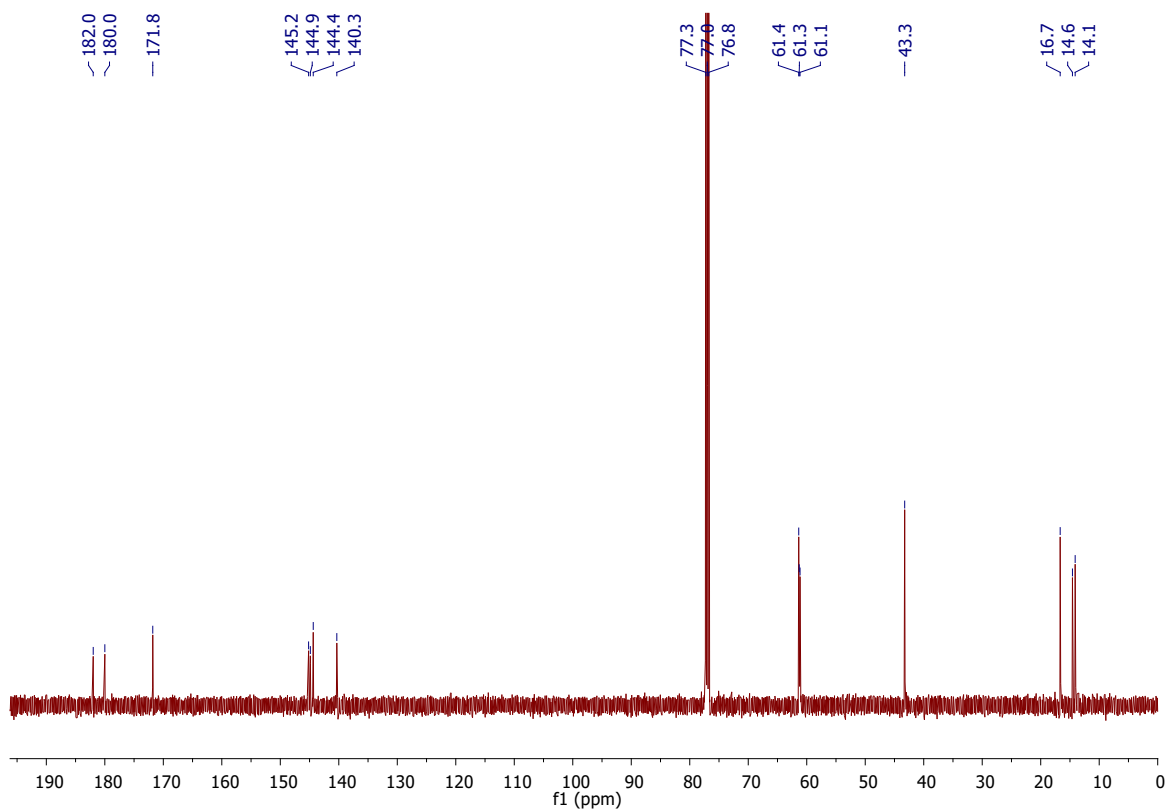

Figure S6:  $^{13}\text{C}$  NMR (125 MHz) spectrum of the CoQ3 in  $\text{CDCl}_3\text{-}d_1$

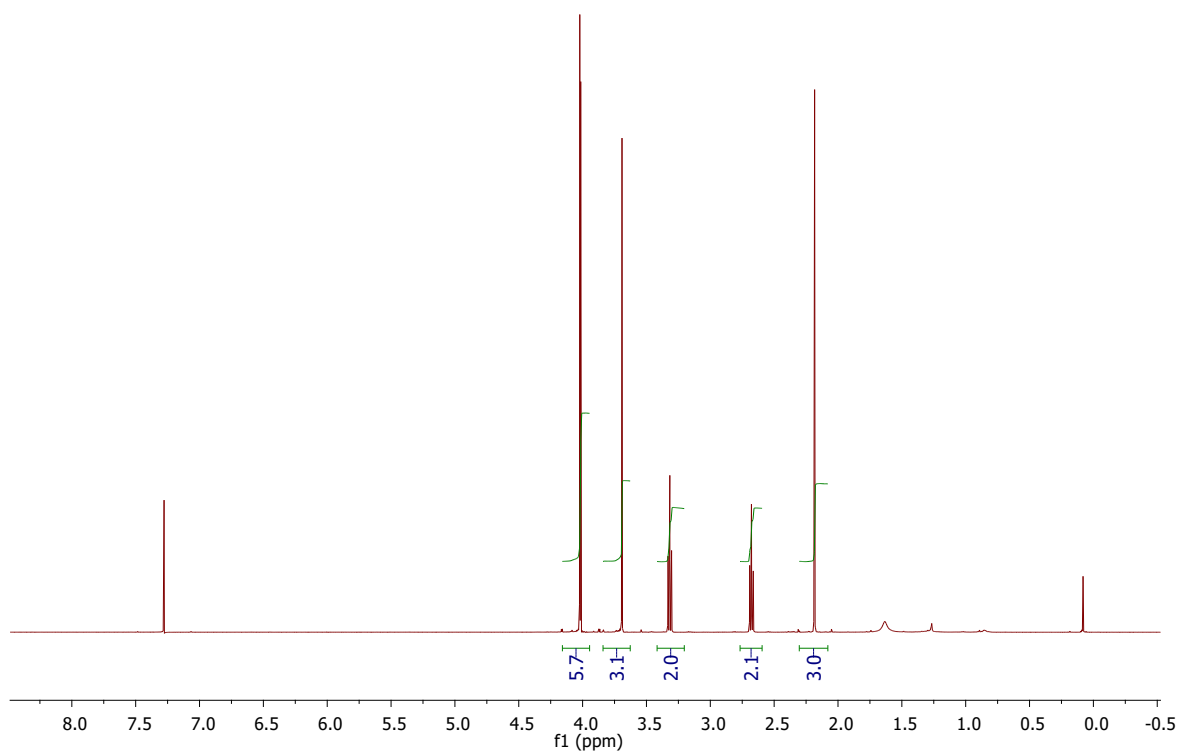

**Figure S7:**  $^1\text{H}$  NMR (500 MHz) spectrum of the CoQ4 in  $\text{CDCl}_3-d_1$

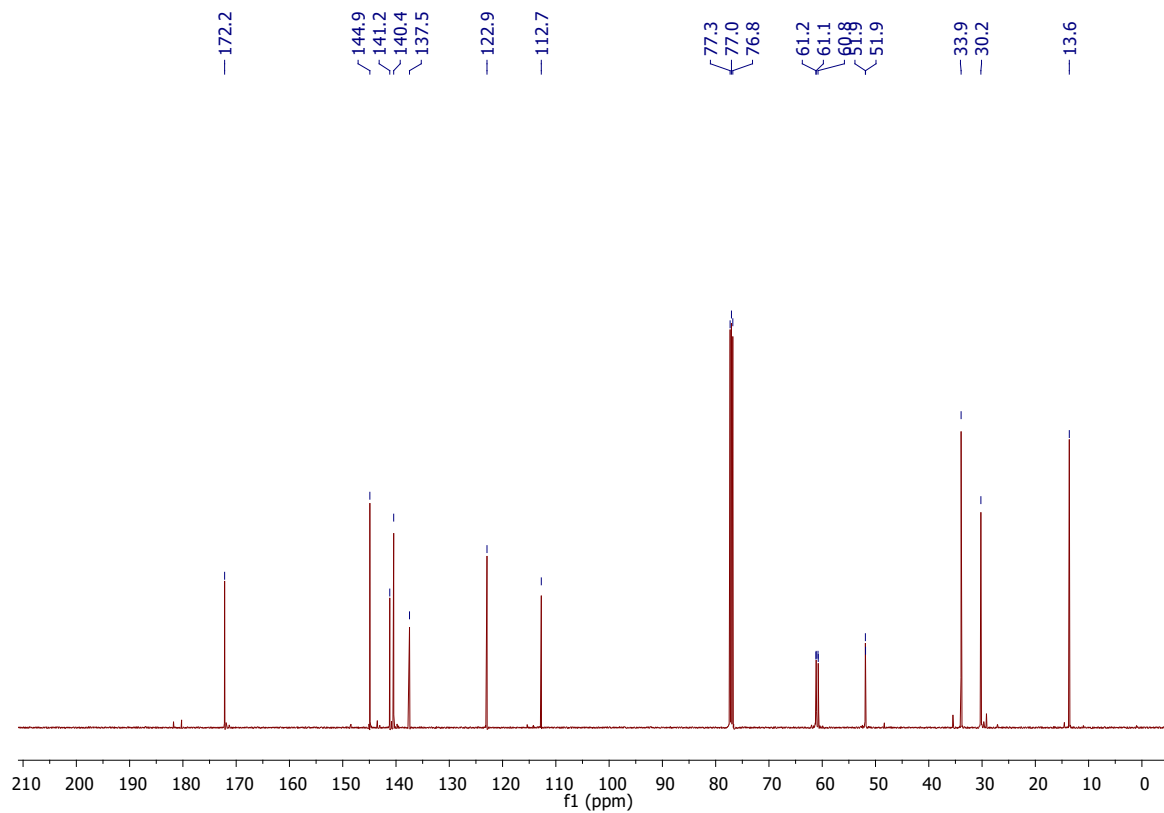

**Figure S8:**  $^{13}\text{C}$  NMR (125 MHz) spectrum of the CoQ4 in  $\text{CDCl}_3-d_1$

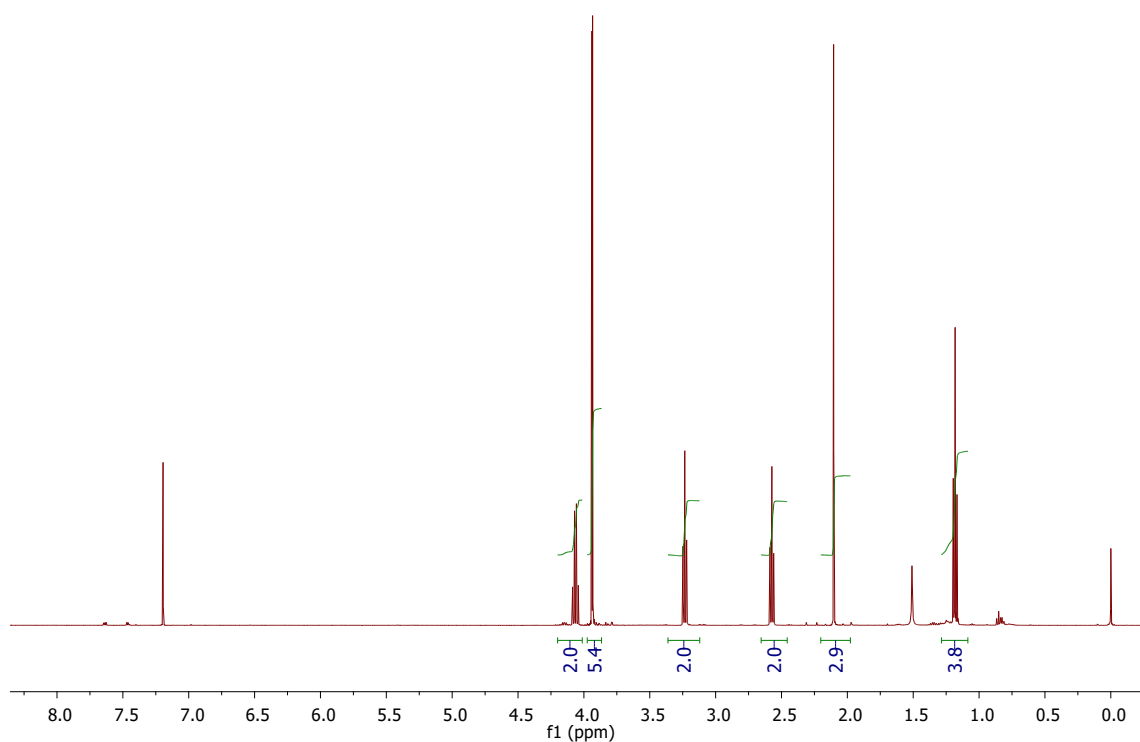

**Figure S9:**  $^1\text{H}$  NMR (500 MHz) spectrum of the CoQ5 in  $\text{CDCl}_3\text{-}d_1$

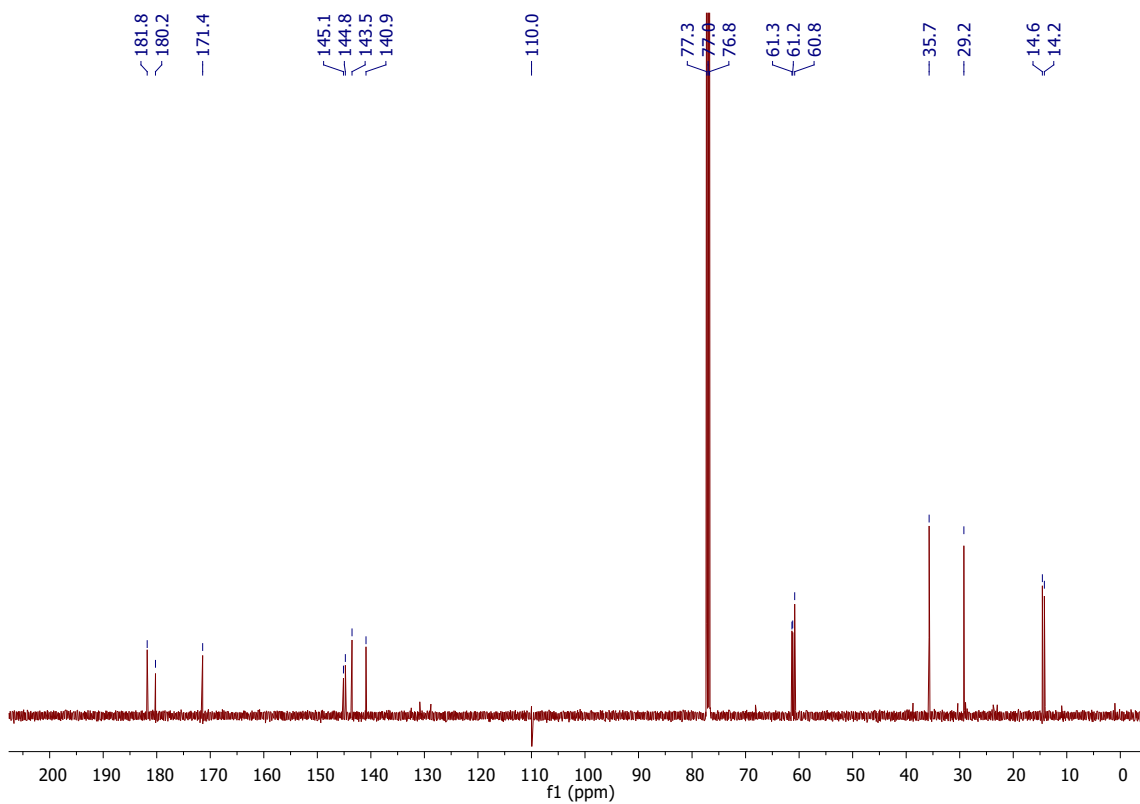

**Figure S10:**  $^{13}\text{C}$  NMR (125 MHz) spectrum of the CoQ5 in  $\text{CDCl}_3\text{-}d_1$



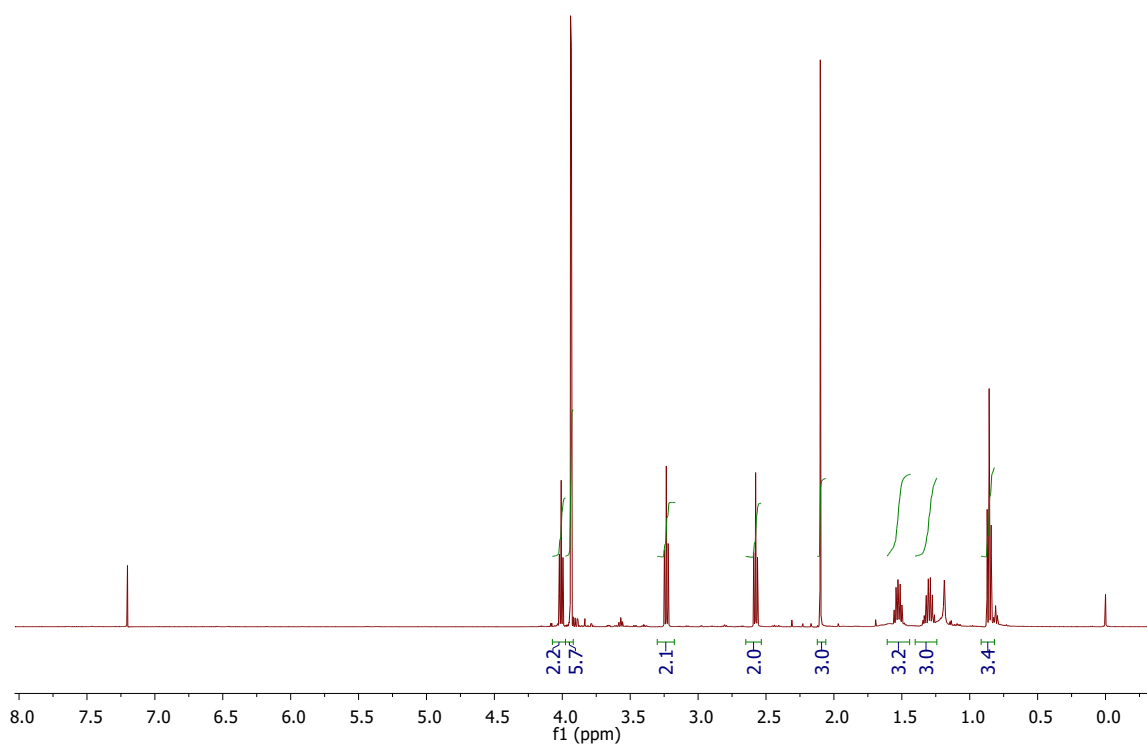

**Figure S11:**  $^1\text{H}$  NMR (500 MHz) spectrum of the CoQ6 in  $\text{CDCl}_3-d_1$

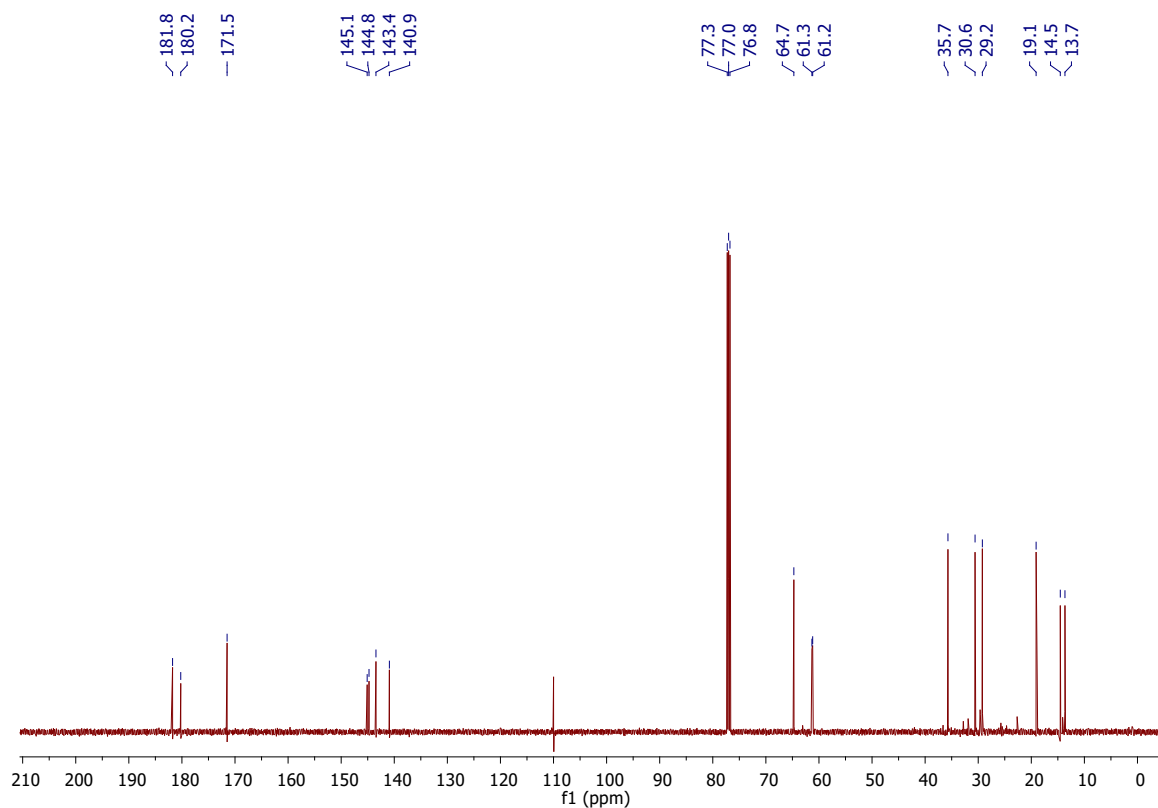

**Figure S12:**  $^{13}\text{C}$  NMR (125 MHz) spectrum of the CoQ6 in  $\text{CDCl}_3-d_1$

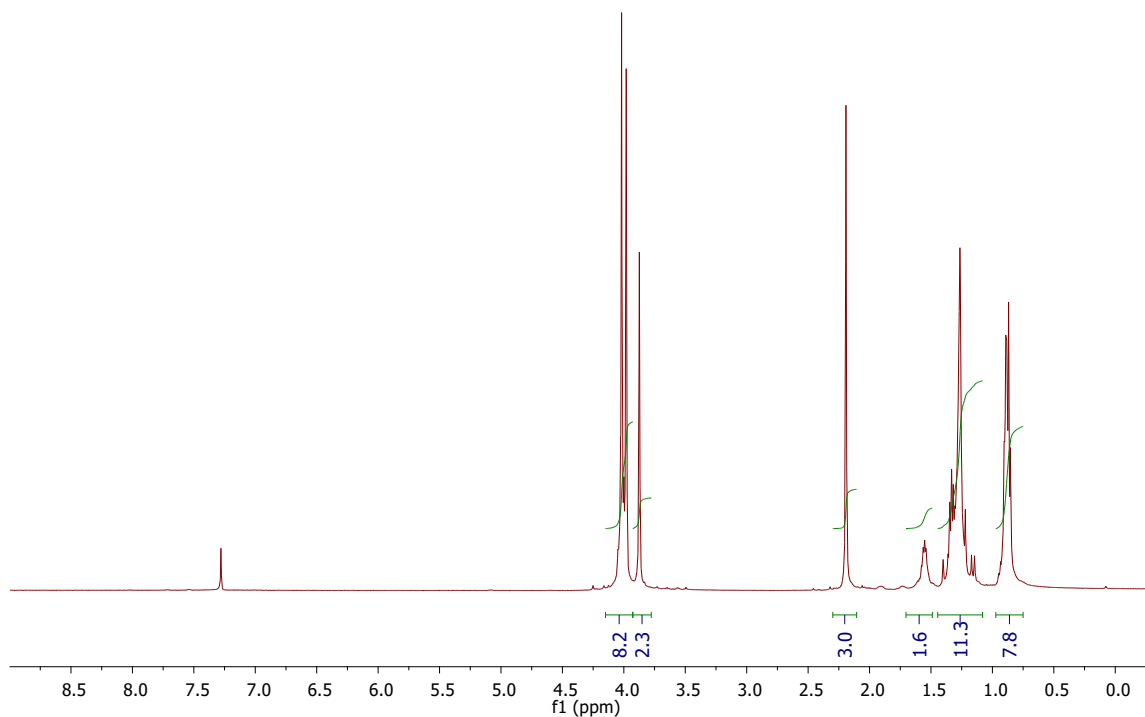

**Figure S13:**  $^1\text{H}$  NMR (500 MHz) spectrum of the **CoQ7** in  $\text{CDCl}_3\text{-}d1$

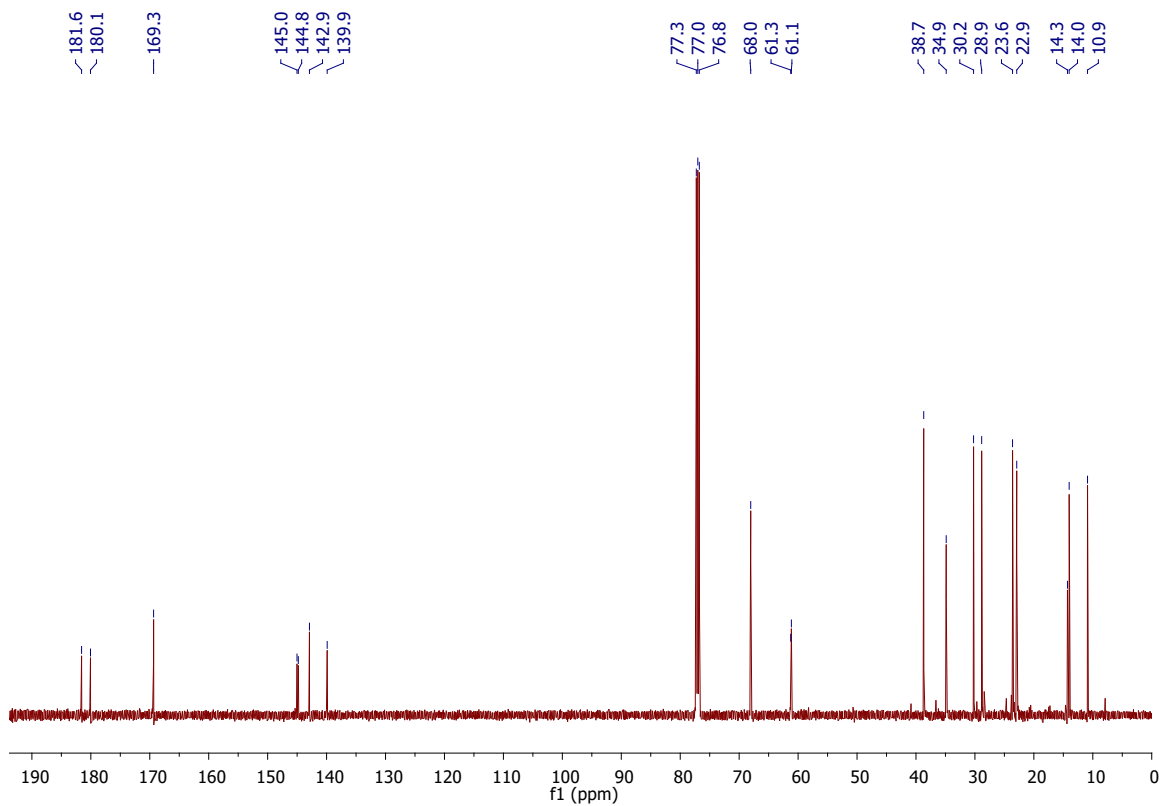

**Figure S14:**  $^{13}\text{C}$  NMR (125 MHz) spectrum of the **CoQ7** in  $\text{CDCl}_3\text{-}d1$

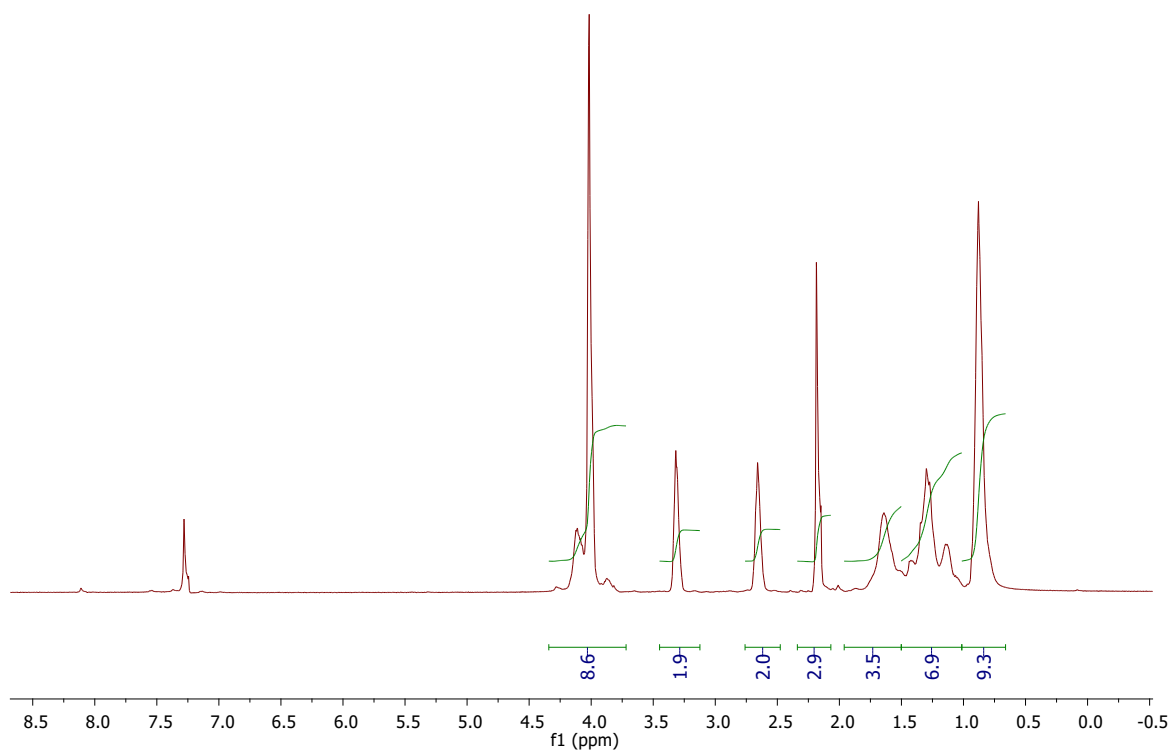

**Figure S15:**  $^1\text{H}$  NMR (500 MHz) spectrum of the CoQ8 in  $\text{CDCl}_3\text{-}d_1$

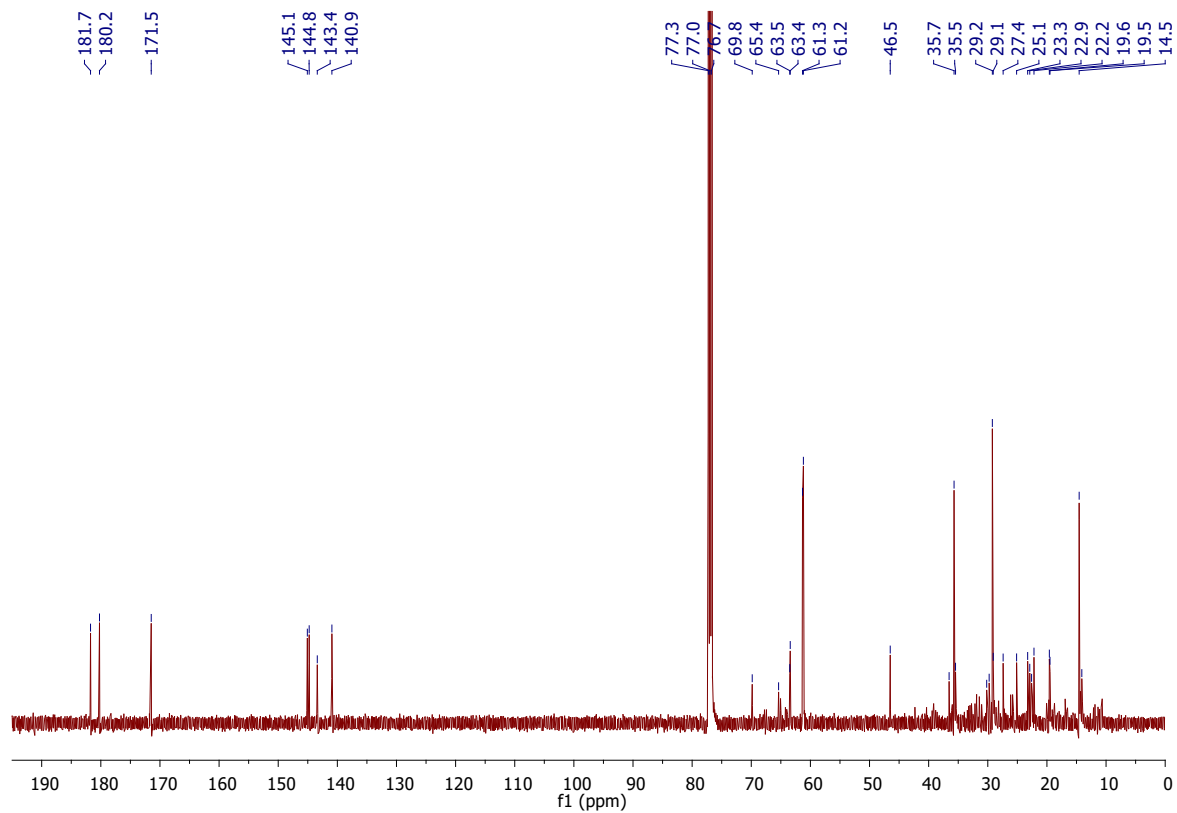

**Figure S16:**  $^{13}\text{C}$  NMR (125 MHz) spectrum of the CoQ8 in  $\text{CDCl}_3\text{-}d_1$

## Crystallographic data of CoQ1

### Computing details

Data collection: Bruker Instrument Service v2013.12.0.0 (Bruker AXS); cell refinement: APEX2 v2014.9-0 (Bruker AXS); data reduction: SAINT V8.34A (Bruker AXS); program(s) used to solve structure: SHELXTL V6.14 (Bruker AXS); program(s) used to refine structure: SHELXTL V6.14 (Bruker AXS); molecular graphics: Mercury (Macrae et al., 2006); software used to prepare material for publication: PLATON V1.16 (Spek, 2009), SHELXTL V6.14 (Bruker AXS).

### Crystal data

C<sub>12</sub>H<sub>14</sub>O<sub>6</sub>S  
M<sub>r</sub> = 286.29  
Monoclinic, P2<sub>1</sub>/n  
a = 3.9584 (5) Å  
b = 23.942 (3) Å  
c = 13.7731 (15) Å  
β = 91.887 (8)°  
V = 1304.6 (3) Å<sup>3</sup>  
Z = 4

F(000) = 600  
D<sub>x</sub> = 1.458 Mg m<sup>-3</sup>  
Mo Kα radiation, λ = 0.71073 Å  
Cell parameters from 2473 reflections  
θ = 2.3–21.1°  
μ = 0.27 mm<sup>-1</sup>  
T = 293 K  
Plate, red  
0.51 × 0.06 × 0.05 mm

### Data collection

Bruker APEX II QUAZAR three-circle diffractometer  
Radiation source: microfocus sealed tube, ImuS  
Multilayer QUAZAR mirrors monochromator  
Detector resolution: 8.3333 pixels mm<sup>-1</sup>  
φ and ω scans  
θ<sub>max</sub> = 25.0°, θ<sub>min</sub> = 1.7°  
h = -4 → 4  
k = -28 → 28  
l = -16 → 16

Absorption correction: multi-scan  
SADABS V2014/4 (Bruker AXS)  
T<sub>min</sub> = 0.87, T<sub>max</sub> = 0.99  
18184 measured reflections  
2291 independent reflections  
1555 reflections with I > 2σ(I)  
R<sub>int</sub> = 0.078

### Refinement

Refinement on F<sub>2</sub>  
Least-squares matrix: full  
R[F<sup>2</sup> > 2σ(F<sup>2</sup>)] = 0.049  
wR(F<sup>2</sup>) = 0.124  
S = 1.04  
2291 reflections  
176 parameters  
0 restraints

Hydrogen site location: inferred from neighbouring sites  
H-atom parameters constrained  
w = 1/[σ<sup>2</sup>(F<sub>o</sub><sup>2</sup>) + (0.0386P)<sup>2</sup> + 1.4745P]  
where P = (F<sub>o</sub><sup>2</sup> + 2F<sub>c</sub><sup>2</sup>)/3  
(Δ/σ)<sub>max</sub> = 0.015  
Δρ<sub>max</sub> = 0.25 e Å<sup>-3</sup>  
Δρ<sub>min</sub> = -0.21 e Å<sup>-3</sup>

### Special details

Geometry. All esds (except the esd in the dihedral angle between two l.s. planes) are estimated using the full covariance matrix. The cell esds are taken into account individually in the estimation of esds in distances, angles and torsion angles; correlations between esds in cell parameters are only used when they are defined by crystal symmetry. An approximate (isotropic) treatment of cell esds is used for estimating esds involving l.s. planes.

Geometric parameters (Å, °) for **CoQ1**

|                |             |               |            |
|----------------|-------------|---------------|------------|
| S1—C4          | 1.761 (3)   | C3—C2         | 1.485 (4)  |
| S1—C3          | 1.803 (3)   | C3—H3A        | 0.97       |
| O3—C11         | 1.218 (4)   | C3—H3B        | 0.97       |
| O4—C10         | 1.365 (4)   | C8—C7         | 1.490 (5)  |
| O4—C12         | 1.446 (4)   | C6—H6A        | 0.96       |
| O1—C2          | 1.318 (4)   | C6—H6B        | 0.96       |
| O1—C1          | 1.444 (4)   | C6—H6C        | 0.96       |
| O5—C8          | 1.344 (4)   | C12—H12A      | 0.96       |
| O5—C9          | 1.413 (4)   | C12—H12B      | 0.96       |
| O6—C7          | 1.209 (4)   | C12—H12C      | 0.96       |
| O2—C2          | 1.188 (4)   | C9—H9A        | 0.96       |
| C10—C8         | 1.337 (4)   | C9—H9B        | 0.96       |
| C10—C11        | 1.473 (4)   | C9—H9C        | 0.96       |
| C11—C4         | 1.497 (4)   | C1—H1A        | 0.96       |
| C4—C5          | 1.343 (4)   | C1—H1B        | 0.96       |
| C5—C7          | 1.486 (5)   | C1—H1C        | 0.96       |
| C5—C6          | 1.495 (4)   |               |            |
| C4—S1—C3       | 100.42 (15) | O6—C7—C5      | 120.5 (3)  |
| C10—O4—C12     | 115.5 (3)   | O6—C7—C8      | 120.0 (3)  |
| C2—O1—C1       | 118.8 (3)   | C5—C7—C8      | 119.4 (3)  |
| C8—O5—C9       | 122.5 (3)   | C5—C6—H6A     | 109.5      |
| C8—C10—O4      | 122.2 (3)   | C5—C6—H6B     | 109.5      |
| C8—C10—C11     | 120.4 (3)   | H6A—C6—H6B    | 109.5      |
| O4—C10—C11     | 116.9 (3)   | C5—C6—H6C     | 109.5      |
| O3—C11—C10     | 120.3 (3)   | H6A—C6—H6C    | 109.5      |
| O3—C11—C4      | 121.0 (3)   | H6B—C6—H6C    | 109.5      |
| C10—C11—C4     | 118.7 (3)   | O4—C12—H12A   | 109.5      |
| C5—C4—C11      | 119.9 (3)   | O4—C12—H12B   | 109.5      |
| C5—C4—S1       | 121.4 (2)   | H12A—C12—H12B | 109.5      |
| C11—C4—S1      | 118.2 (2)   | O4—C12—H12C   | 109.5      |
| C4—C5—C7       | 119.7 (3)   | H12A—C12—H12C | 109.5      |
| C4—C5—C6       | 124.6 (3)   | H12B—C12—H12C | 109.5      |
| C7—C5—C6       | 115.7 (3)   | O5—C9—H9A     | 109.5      |
| C2—C3—S1       | 110.5 (2)   | O5—C9—H9B     | 109.5      |
| C2—C3—H3A      | 109.5       | H9A—C9—H9B    | 109.5      |
| S1—C3—H3A      | 109.5       | O5—C9—H9C     | 109.5      |
| C2—C3—H3B      | 109.5       | H9A—C9—H9C    | 109.5      |
| S1—C3—H3B      | 109.5       | H9B—C9—H9C    | 109.5      |
| H3A—C3—H3B     | 108.1       | O1—C1—H1A     | 109.5      |
| C10—C8—O5      | 129.4 (3)   | O1—C1—H1B     | 109.5      |
| C10—C8—C7      | 120.1 (3)   | H1A—C1—H1B    | 109.5      |
| O5—C8—C7       | 110.5 (3)   | O1—C1—H1C     | 109.5      |
| O2—C2—O1       | 124.1 (3)   | H1A—C1—H1C    | 109.5      |
| O2—C2—C3       | 125.8 (3)   | H1B—C1—H1C    | 109.5      |
| O1—C2—C3       | 110.2 (3)   |               |            |
| C12—O4—C10—C8  | 124.0 (4)   | C11—C10—C8—O5 | -176.3 (4) |
| C12—O4—C10—C11 | -64.0 (4)   | O4—C10—C8—C7  | 174.2 (3)  |
| C8—C10—C11—O3  | 165.0 (3)   | C11—C10—C8—C7 | 2.5 (5)    |
| O4—C10—C11—O3  | -7.2 (5)    | C9—O5—C8—C10  | -17.9 (6)  |
| C8—C10—C11—C4  | -13.4 (5)   | C9—O5—C8—C7   | 163.3 (3)  |
| O4—C10—C11—C4  | 174.4 (3)   | C1—O1—C2—O2   | 1.9 (6)    |
| O3—C11—C4—C5   | -162.6 (3)  | C1—O1—C2—C3   | -177.9 (3) |
| C10—C11—C4—C5  | 15.8 (5)    | S1—C3—C2—O2   | -0.1 (5)   |
| O3—C11—C4—S1   | 9.4 (4)     | S1—C3—C2—O1   | 179.7 (2)  |
| C10—C11—C4—S1  | -172.1 (2)  | C4—C5—C7—O6   | 179.6 (4)  |
| C3—S1—C4—C5    | -136.1 (3)  | C6—C5—C7—O6   | -1.9 (5)   |

|              |            |              |            |
|--------------|------------|--------------|------------|
| C3—S1—C4—C11 | 52.0 (3)   | C4—C5—C7—C8  | -4.1 (5)   |
| C11—C4—C5—C7 | -7.0 (5)   | C6—C5—C7—C8  | 174.4 (3)  |
| S1—C4—C5—C7  | -178.8 (3) | C10—C8—C7—O6 | -177.1 (4) |
| C11—C4—C5—C6 | 174.7 (3)  | O5—C8—C7—O6  | 1.8 (5)    |
| S1—C4—C5—C6  | 2.9 (5)    | C10—C8—C7—C5 | 6.5 (5)    |
| C4—S1—C3—C2  | 175.5 (3)  | O5—C8—C7—C5  | -174.5 (3) |
| O4—C10—C8—O5 | -4.5 (6)   |              |            |

### Hydrogen-bond geometry (Å, °) for **CoQ1**

| D—H···A       | D—H  | H···A | D···A     | D—H···A |
|---------------|------|-------|-----------|---------|
| C3—H3A···O3   | 0.97 | 2.33  | 2.974 (4) | 123     |
| C3—H3B···O3i  | 0.97 | 2.60  | 3.425 (4) | 143     |
| C9—H9A···O4i  | 0.96 | 2.65  | 3.508 (5) | 149     |
| C1—H1A···O5ii | 0.96 | 2.54  | 3.456 (5) | 160     |

Symmetry codes: (i)  $x+1, y, z$ ; (ii)  $-x+3/2, y+1/2, -z+1/2$ .

**Table S2.** Crystallographic data for the **CoQ1**.

| Identification code                        | CoQ1                                                                                                                |
|--------------------------------------------|---------------------------------------------------------------------------------------------------------------------|
| Chemical formula                           | $C_{12}H_{14}O_6S$                                                                                                  |
| Formula weight (g mol <sup>-1</sup> )      | 286.29                                                                                                              |
| Temperature (K)                            | 273                                                                                                                 |
| Radiation $\lambda$ (Å)                    | 0.71073                                                                                                             |
| Crystal system                             | Monoclinic                                                                                                          |
| Space groups, Z                            | $P 1 2_1/n 1, 4$                                                                                                    |
| Unit cell dimensions (Å)                   | $a = 3.9584(5)$<br>$b = 23.942(3)$<br>$c = 13.7731(15)$<br>$\alpha, \gamma = 90^\circ$<br>$\beta = 91.887(8)^\circ$ |
| Volume (Å <sup>3</sup> )                   | 1304.6(3)                                                                                                           |
| Crystal sizes (mm)                         | 0.053 x 0.055 x 0.507                                                                                               |
| dcalc (g cm <sup>-3</sup> )                | 1.458                                                                                                               |
| Absorption coefficient (mm <sup>-1</sup> ) | 0.268                                                                                                               |
| Absorption correction, Tmin, Tmax          | multi-scan, 0.986 and 0.876                                                                                         |
| $\theta_{max}$ , deg                       | 1.70 to 25.00                                                                                                       |
| Goodness-of-fit on F <sup>2</sup>          | 1.039                                                                                                               |
| Index ranges                               | $-4 \leq h \leq 4$<br>$-28 \leq k \leq 28$<br>$-16 \leq l \leq 16$                                                  |
| Reflections collected                      | 18184                                                                                                               |
| Independent reflections                    | 2291 [R(int) = 0.0781]                                                                                              |
| Final R indices [I > 2 $\sigma$ (I)]       | 1555 data<br>R1 = 0.0491<br>wR2 = 0.1037                                                                            |

|                                                 |                                             |
|-------------------------------------------------|---------------------------------------------|
| R indices (all data)                            | R1 = 0.0872<br>wR2 = 0.1244                 |
| Refinement method                               | Full-matrix least-squares on F <sup>2</sup> |
| Data/restraints/parameters                      | 2291 / 0 / 176                              |
| Largest diff. peak and hole (eÅ <sup>-3</sup> ) | 0.253 and -0.212                            |

**Table S3.** Selected bond lengths (Å) for **CoQ1**

|        |          |        |          |
|--------|----------|--------|----------|
| S1-C4  | 1.761(3) | S1-C3  | 1.803(3) |
| O3-C11 | 1.218(4) | O4-C10 | 1.365(4) |
| O4-C12 | 1.446(4) | O1-C2  | 1.318(4) |
| O1-C1  | 1.444(4) | O5-C8  | 1.344(4) |
| O5-C9  | 1.413(4) | O6-C7  | 1.209(4) |
| O2-C2  | 1.188(4) | C3-C2  | 1.485(4) |

**Table S4.** Selected bond angles (°) for **CoQ1**

|            |            |            |          |
|------------|------------|------------|----------|
| C4-S1-C3   | 100.42(15) | C10-O4-C12 | 115.5(3) |
| C2-O1-C1   | 118.8(3)   | C8-O5-C9   | 122.5(3) |
| O4-C10-C11 | 116.9(3)   | O5-C8-C7   | 110.5(3) |

**Table S5.** Selected torsion angles (°) for **CoQ1**

|              |           |                |           |
|--------------|-----------|----------------|-----------|
| O3-C11-C4-S1 | 9.4(4)    | C12-O4-C10-C11 | -64.0(4)  |
| C3-S1-C4-C5  | -136.1(3) | O4-C10-C11-O3  | -7.2(5)   |
| C3-S1-C4-C11 | 52.0(3)   | O5-C8-C7-O6    | 1.8(5)    |
| S1-C4-C5-C7  | -178.8(3) | C9-O5-C8-C7    | 163.3(3)  |
| S1-C4-C5-C6  | 2.9(5)    | C1-O1-C2-C3    | -177.9(3) |
| C4-S1-C3-C2  | 175.5(3)  | C1-O1-C2-O2    | 1.9(6)    |

**Table S6.** Hydrogen-bond geometry (Å, °) for **CoQ1**

| D-H...A                   | Donor-H | Acceptor-H | Donor-Acceptor | Angle |
|---------------------------|---------|------------|----------------|-------|
| C3-H3A...O3               | 0.97    | 2.33       | 2.974(4)       | 123.0 |
| C3-H3B...O3 <sup>i</sup>  | 0.97    | 2.60       | 3.425(4)       | 143.3 |
| C9-H9A...O4 <sup>i</sup>  | 0.96    | 2.65       | 3.508(5)       | 148.8 |
| C1-H1A...O5 <sup>ii</sup> | 0.96    | 2.54       | 3.456(5)       | 160.4 |

Symmetry codes: (i)  $x+1, y, z$ ; (ii)  $-x+3/2, y+1/2, -z+1/2$



**ADME data for CoQ3-8**

| <b>Property/rule</b> | <b>CoQ3</b>      | <b>CoQ4</b>      | <b>CoQ5</b>      | <b>CoQ6</b>      | <b>CoQ7</b>      | <b>CoQ8</b>      |
|----------------------|------------------|------------------|------------------|------------------|------------------|------------------|
| MW                   | 314              | 300              | 314              | 342              | 384              | 384              |
| Log P                | 2.80             | 2.62             | 2.31             | 3.47             | 3.69             | 3.62             |
| TPSA Å <sup>2</sup>  | 104.20           | 104.20           | 104.20           | 104.20           | 104.20           | 104.20           |
| HBA                  | 6                | 6                | 6                | 6                | 6                | 6                |
| HBD                  | 0                | 0                | 0                | 0                | 0                | 0                |
| Lipinski             | Yes, 0 violation |
| Ghose                | Yes              | Yes              | Yes              | Yes              | Yes              | Yes              |
| Veber                | Yes              | Yes              | Yes              | Yes              | No               | No               |
| Egan                 | Yes              | Yes              | Yes              | Yes              | Yes              | Yes              |
| Muegge               | Yes              | Yes              | Yes              | Yes              | Yes              | Yes              |
| Leadlikeness         | Yes              | Yes              | Yes              | No               | No               | Yes              |

| <b>Property</b>                         | <b>CoQ3</b> | <b>CoQ4</b> | <b>CoQ5</b> | <b>CoQ6</b>        | <b>CoQ7</b>        | <b>CoQ8</b>        |
|-----------------------------------------|-------------|-------------|-------------|--------------------|--------------------|--------------------|
| BBB permeability                        | No          | No          | No          | No                 | No                 | No                 |
| GI absorption                           | High        | High        | High        | High               | High               | High               |
| Log <i>S</i>                            | -2.70       | -2.07       | -2.32       | -2.9               | -4.2               | -4.2               |
| Solubility                              | Soluble     | Soluble     | Soluble     | Moderately Soluble | Moderately Soluble | Moderately Soluble |
| Bioavailability score                   | 0.56        | 0.56        | 0.56        | 0.56               | 0.56               | 0.56               |
| CYP1A2,<br>CYP2C9,<br>CYP2D6,<br>CYP3A4 | No          | No          | No          | No                 | No                 | No                 |
